# Supplementary material for: Globally asynchronous sulphur isotope signals require re-definition of the Great Oxidation Event
Source: PubMed Central journal article supplement (PMC5993798; doi:10.1038/s41467-018-04621-x), 2018-06-08
Supplement: 41467_2018_4621_MOESM3_ESM.pdf [file 41467_2018_4621_MOESM3_ESM.pdf]

## **Description of Additional Supplementary Files**

File Name: Supplementary Data 1

Description: LA-ICPMS trace metal abundances of pyrite.

File Name: Supplementary Data 2

Description: Sulphur content.

File Name: Supplementary Data 3

Description: Bulk sulphur isotope analyses.

File Name: Supplementary Data 4

Description: SHRIMP-SI in situ multiple sulphur isotopic compositions (all analyses are pyrite except where indicated).
